# Supplementary material for: Profile of Basal Cell Carcinoma Mutations and Copy Number Alterations - Focus on Gene-Associated Noncoding Variants
Source: Frontiers journal article supplement (doi:10.3389/fonc.2021.752579), 2021-11-25
Supplement: Data_Sheet_1.pdf [file Data_Sheet_1.pdf]

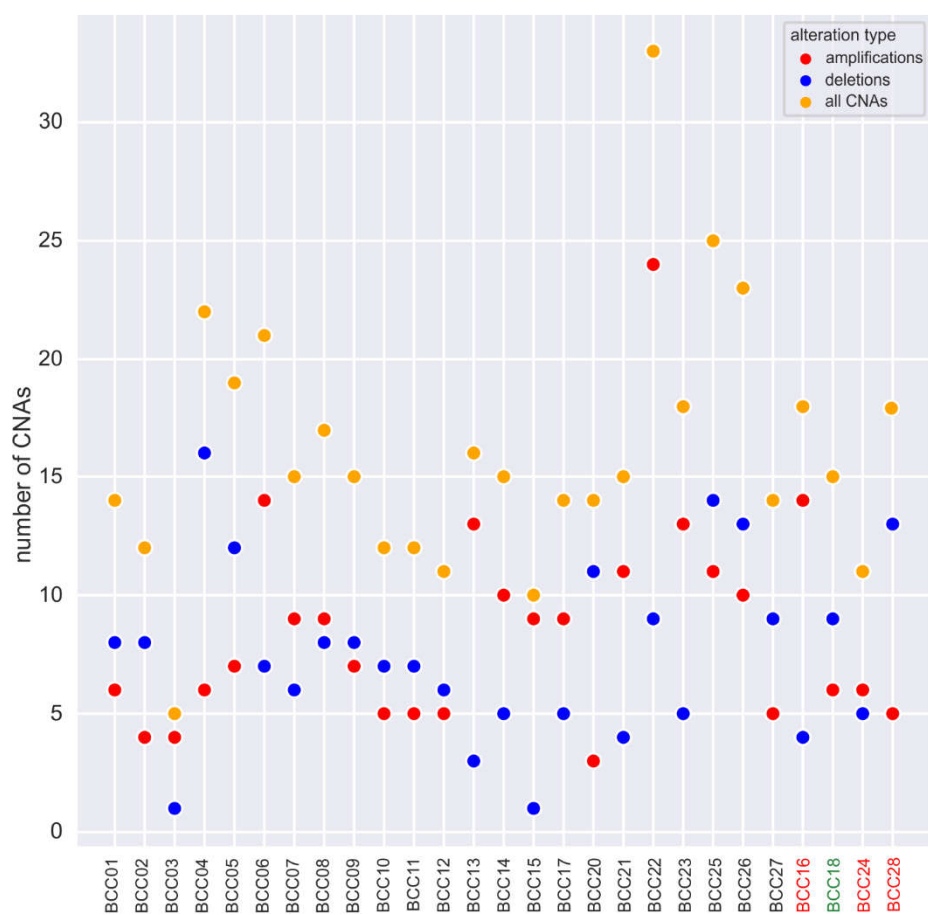

**S1 Fig. Concurrence of *KNSTRN* mutations and CNAs.** The number of amplifications (red dots), deletions (blue dots), and total CNAs (orange dots) in samples without and with the *KNSTRN* mutations (red fonts - the hotspot mutation; green fonts - other mutation).

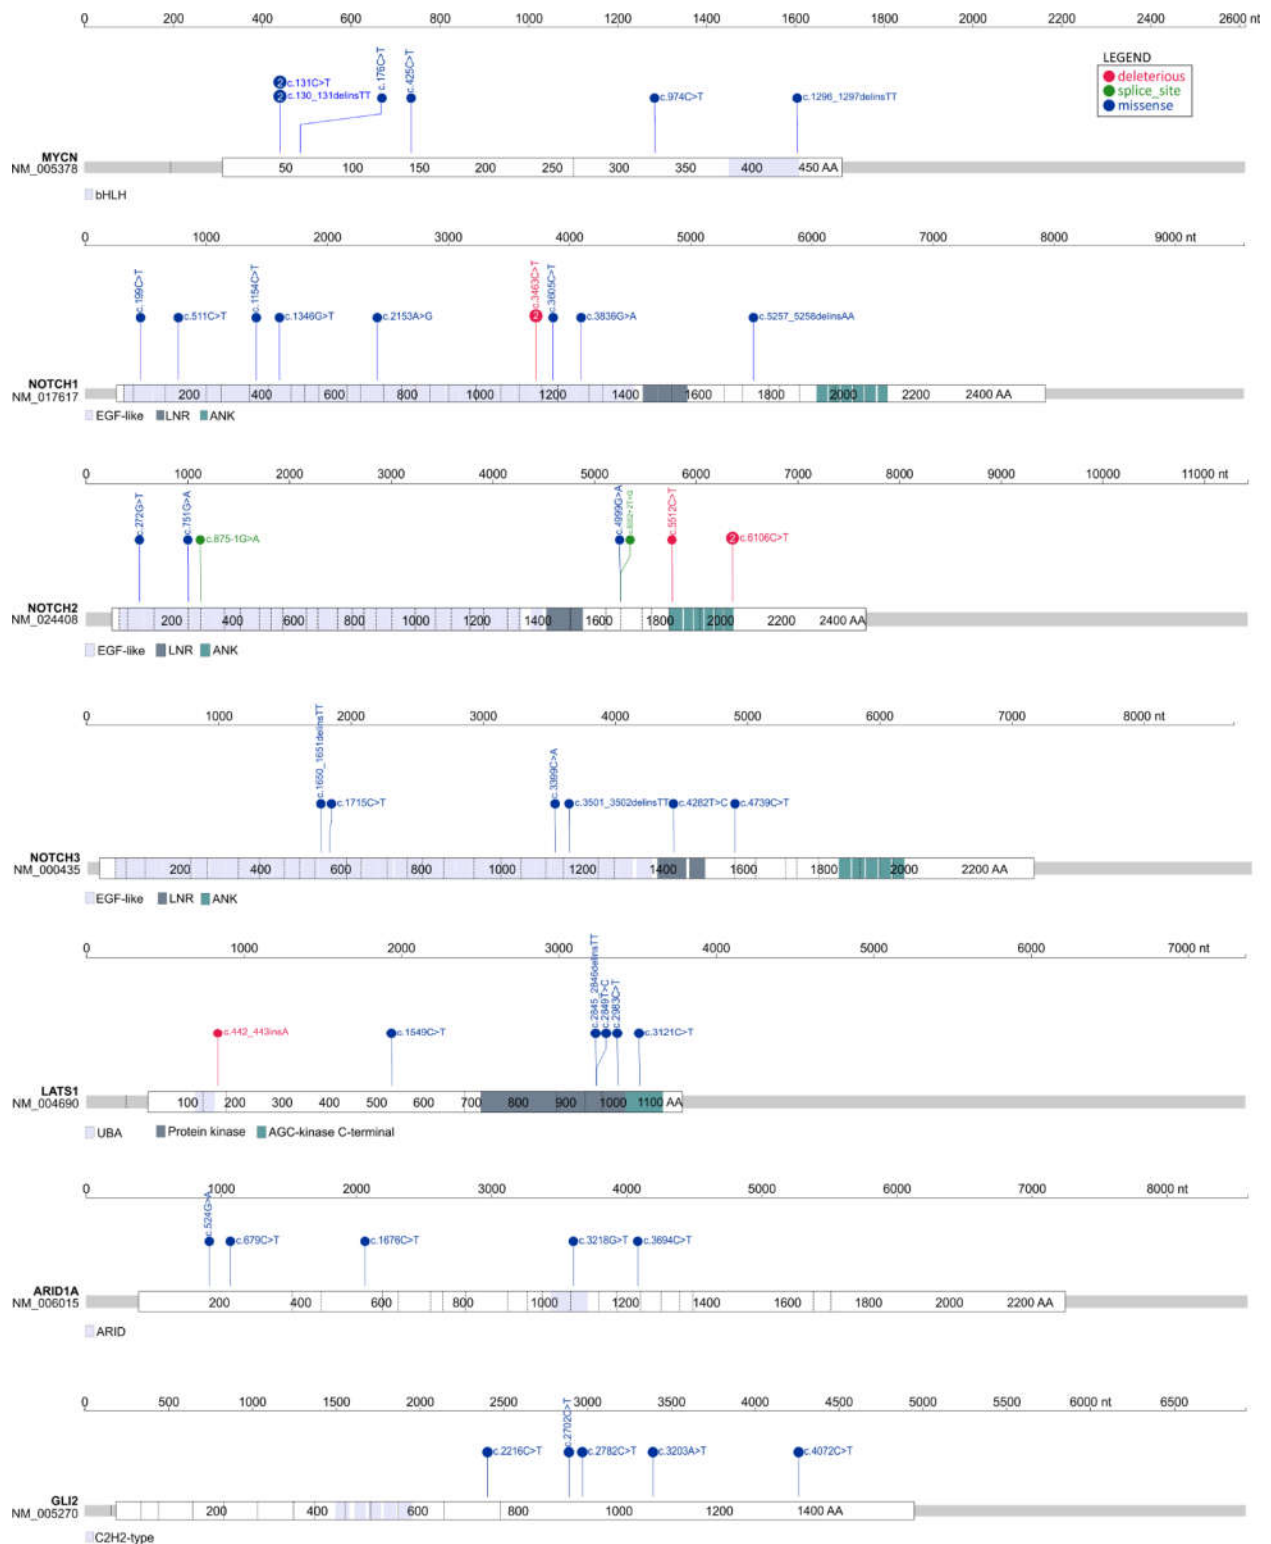

**S2 Fig. Distribution of the identified mutations in the selected genes frequently mutated in the coding sequence.** Distribution of mutations in the selected genes frequently mutated in coding regions. A)-F) Maps of *MYCN*, *NOTCH1*, *NOTCH2*, *NOTCH3*, *LATS1*, and *ARID1A*, respectively.

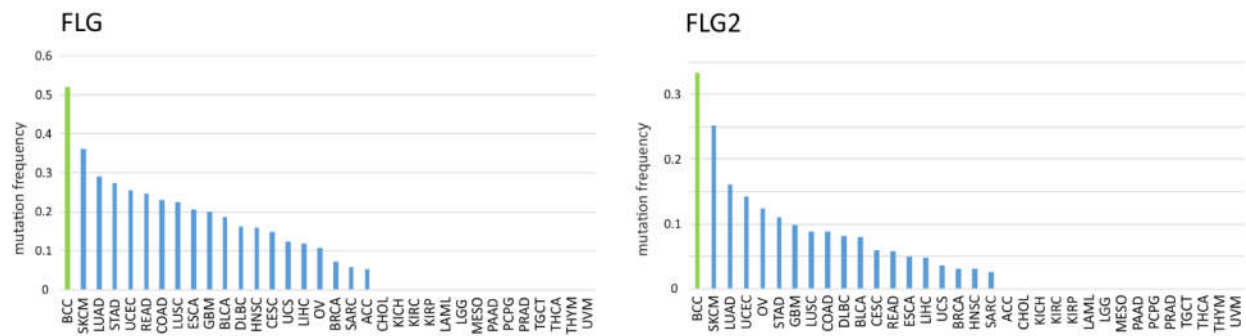

**S3 Fig. Frequency of mutations in the *FLG* and *FLG2* genes in BCC and other cancer types.** Bar graphs showing the frequency of mutations in A) *FLG*, and B) *FLG2* in BCC (current study, green bar) and TCGA cancer types.

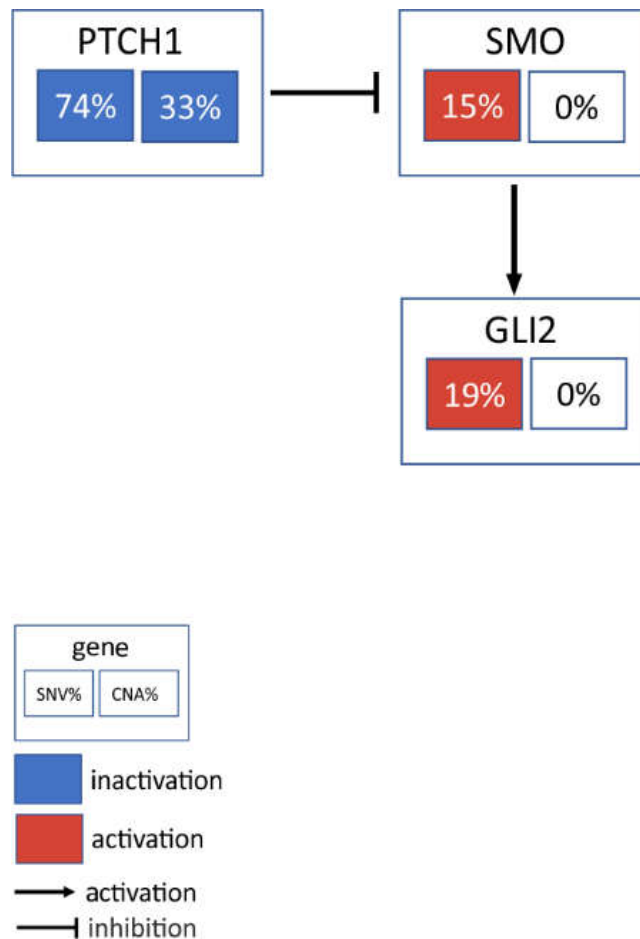

**S4 Fig. Frequency of activating (red) and deactivating (blue) mutations in the genes of the hedgehog pathway.**
