# Supplementary material for: Profile of Basal Cell Carcinoma Mutations and Copy Number Alterations - Focus on Gene-Associated Noncoding Variants
Source: Front Oncol. 2021 Nov 25;11:752579. doi: 10.3389/fonc.2021.752579 (PMC8656283; doi:10.3389/fonc.2021.752579)
Supplement: Supplementary file 2 [file Table_1.xlsx]

## Sheet: S1 Table
S1 Table. List of the primers used for PCR.
Primer_ID	Primer_sequence
SCNM1_F	TCTGAAATCCTTTGTATGCAGAAC
SCNM1_R	CTTCTTGTGGGGCTCATGG
FLG2_ex3_F1	TCCAGATGTCTGTCCTGAAT
FLG2_ex3_R1	GGTCAGGCTCAGGTCAATC
FLG2_ex3_F2	GGCTAGATCTCTGTCTTCCAGT
FLG2_ex3_R2	ACTCACGGCCAAAGTGGAT
FLG2_ex3_F3	CATGCCTTTGCCTTTCACTAC
FLG2_ex3_R3	CTGGAAGACAAAGATCTAGTCACA
RPS27_F	TGATCAAACGCTGACCTCAA
RPS27_R	GAAAATAGCCCCCACTGTCA
DYRK3_F	CAAGTTTGCCCAGTCCATCT
DYRK3_R	GAAGTTTTGGTGGTGGCATC
MYCN_F1	GTGTCTGTCGGTTGCAGTGT
MYCN_R1	CACAGCTCGTTCTCAAGCAG
MYCN_F2	GCTGTCACCACATTCACCAT
MYCN_R2	GTGAGAAAGCTGGACCGAAG
MYCN_F3	CTTCGGTCCAGCTTTCTCAC
MYCN_R3	AACCGTCACCAACGTTTAGC
MYCN_F4	CCCTACGTGGAGAGTGAGGA
MYCN_R4	AAATGTGCAAAGTGGCAGTG
PTCH1_ex17_F	ACACATCCTCGTCTCCCAGA
PTCH1_ex17_R	TGTTCTGATGGGATTTTCGAC
PTCH11_ex14_F	TGGCTTTTGGTTTCAAGAGG
PTCH11_ex14_R	CAGCAATGTGATGTTTCTCTCC
PTCH1_ex12_F	TAAAGCAGCATCCACCCAGT
PTCH1_ex12_R	TGCTGGTGTTAGGGGGTAAG
PTCH1_ex6_F	TGTTTTGCTCTCCACCCTTC
PTCH1_ex6_R	GCATTTGTTTTGATGCCAGA
AMBRA1_F1	AGTGGCACTCACTCGGTCTT
AMBRA1_R1	TGTAGTTGCAGGAGCACAGG
AMBRA1_F2	CTAGGGGAGCTGCCATACAG
AMBRA1_R2	TGAGCAAGTGAATATGAAGATTAGAGA
BAD_3UTR_F	CAGACGCGGGCTTTATTAAC
BAD_3UTR_R	AGTGACCTTCGCTCCACATC
DHODH_kozak_F	GTGCACCCAACCAGAACCT
DHODH_kozak_R	GGCGGTCATGTGTTCACTAA
TP53_ex4_F	GCCAGGCATTGAAGTCTCAT
TP53_ex4_R	CGTTCTGGTAAGGACAAGGGTT
MISP_F	AAGACCTACCGCCTGGATG
MISP_R	AGCACGCACCTTGTTCTCTT
CASZ1_F	CGAGGGACTCACTTCTCCTG
CASZ1_R	TCCACACCTGTCTTCACTGC
TCHH_F	GGTGCCTGTTTTTGTTGGAT
TCHH_R	CCATGCCTGTGCCAGTATAA
BIRC6_F	CACAACTCTGTGCCTTCCAA
BIRC6_R	TTGGTATTAAAAATTTTGCCTTCT
TTN_F	TTCACTGAAAAGACAGTTTCTCG
TTN_R	TCCTAACCCCATTGTAAAAATAGAA
SCAP_F	CCCCAAGTCCAGGTTCAGT
SCAP_R	GTAGAGGGGATGGGGATCAT
HERC5_F	CTGGAAAACATGGGCAACTT
HERC5_R	GGAGACAGCAGAAAGTGAATTG
KCNN2_F	CTTGTTTTCAGGGTGCTGGT
KCNN2_R	GACTCGTCTTTATCCAAATACCAA
IBTK_F	TCTTTCAGCTTATCAGCATTTTTC
IBTK_R	TTTTTCGTGTCAATGTTTTTAGAC
ADGB_F	TCTTAGCCCGGGATATATGG
ADGB_R	GGCATTTATATGCAATGTCCA
SSPO_F	GTCCTGGTTAACGTCCCTCA
SSPO_R	ACATATATGAGCGGGCCATT
PTCH1_del_F1	TGGCTTTTGGTTTCAAGAGG
PTCH1_del_R1	GCGTCAGCAGAGTGATTCAG
ALG10B_F	AGGTAAGCAGAAATAGCATTTATCA
ALG10B_R	GGATGTAGGGCCAAGTCAAA
FRMPD3_F	TTCCGAGACAACAGCTCTGA
FRMPD3_R	CCAAAGAGATGCAATGACGA
TERTpromoter_F	CCCACGTGCGCAGCAGGAC
TERTpromoter_R	CTCCCAGTGGATTCGCGGGC
DPH3promoter_F2	CCTCGTCATGAAACACTGCC
DPH3promoter_R2	GCAGACGATAAGAAGCAGGG
