# Supplementary material for: Profile of Basal Cell Carcinoma Mutations and Copy Number Alterations - Focus on Gene-Associated Noncoding Variants
Source: Front Oncol. 2021 Nov 25;11:752579. doi: 10.3389/fonc.2021.752579 (PMC8656283; doi:10.3389/fonc.2021.752579)
Supplement: Supplementary file 3 [file Table_2.xlsx]

## Sheet: S2 Table
S2 Table. List of the probes used for the MLPA assay.
probe ID	target sequence position	5'PPS	length	5'SS	length	5'TSS	length	Tm	3'TSS	length	Tm	3'SS	length	3'PSS	length	5'HPL	3'HPL	TPL
ctrl_1	chr22:30,069,296-30,069,338	GGGTTCCCTAAGGGTTGGA	19	cgctac	6	GGCCCAGATCACCGAGGAGGA	21	75.6	GGCAAAACTTCTGGCCCAGAAG	22	71.0	ac	2	TCTAGATTGGATCTTGCTGGCGC	23	46	47	93
JAK2_ex1	chr9:4,985,343-4,985,382	GGGTTCCCTAAGGGTTGGA	19	cgctactac	9	CTTGGGTGTTCGCGTCGCCA	20	75.4	CTTCGGCTTCTCGGCCGGTC	20	75.5	tctac	5	TCTAGATTGGATCTTGCTGGCGC	23	48	48	96
PDL1_ex6	chr9:5,467,928-5,467,969	GGGTTCCCTAAGGGTTGGA	19	cgctactac	9	GCTGAGCGTGACAAGAGGAAGG	22	71.4	AATGGGCCCGTGGGATGCAG	20	74.0	tactac	6	TCTAGATTGGATCTTGCTGGCGC	23	50	49	99
chr9p24.2	chr9:2,811,377-2,811,420	GGGTTCCCTAAGGGTTGGA	19	cgctactact	10	CCAGGATGCAGTCCTGTTGCTG	22	72.5	CCAAGCTGGCGATGGCATTCAT	22	72.9	tactac	6	TCTAGATTGGATCTTGCTGGCGC	23	51	51	102
chr9q21.12	chr9:70,419,662-70,419,715	GGGTTCCCTAAGGGTTGGA	19	cgcta	5	GCAGAGTAGGGTGTCGAGATGACATCAG	28	74.0	CTTCTAAACATAGCAAGCACCGCACC	26	71.7	ctac	4	TCTAGATTGGATCTTGCTGGCGC	23	52	53	105
ctrl_2	chr1:156,105,818-156,105,862	GGGTTCCCTAAGGGTTGGA	19	cgctactactat	12	CAGCTGGACGAGTACCAGGAGCTT	24	72.8	CTGGACATCAAGCTGGCCCTG	21	72.7	aactaaatctac	12	TCTAGATTGGATCTTGCTGGCGC	23	55	56	111
PTCH1_3'	chr9:95,438,463-95,438,519	GGGTTCCCTAAGGGTTGGA	19	cgctactacta	11	TATGCATGTGGATGTGTTTGGGCAACC	27	74.1	GTGTGCATGCATGAAGTATGTTTTACAGCC	30	72.5	ctac	4	TCTAGATTGGATCTTGCTGGCGC	23	57	57	114
PDL2_ex2	chr9:5,522,543-5,522,598	GGGTTCCCTAAGGGTTGGA	19	cgctactact	10	GAACATGATCTTCCTCCTGCTAATGTTGAG	30	71.5	CCTGGAATTGCAGCTTCACCAGATAG	26	72.0	taaatctac	9	TCTAGATTGGATCTTGCTGGCGC	23	59	58	117
PTCH1_5'	chr9:95,521,997-95,522,048	GGGTTCCCTAAGGGTTGGA	19	cgctactactatt	13	TGTGGGAGAAGCTGAGCCTCCAACAGTC	28	77.1	CTTTCATTAGGCTGTGCCCTGGGG	24	75.0	aaactaaatctac	13	TCTAGATTGGATCTTGCTGGCGC	23	60	60	120
ctrl_5	chr2:109,545,794-109,545,837	GGGTTCCCTAAGGGTTGGA	19	cgctactactattagtagaat	21	AGTCCTGTGGCTACGGCACCAA	22	72.8	AGACGAGGACTACGGCTGCGTC	22	71.8	ggtcaaactaaatctac	17	TCTAGATTGGATCTTGCTGGCGC	23	62	62	124
JAK2_ex20	chr9:5,089,805-5,089,863	GGGTTCCCTAAGGGTTGGA	19	cgctactactattagtag	18	CCTGAAATCCCTACAGCATGACAACATTG	29	72.9	TAAAGTACAAGGGAGTGTGCTACAGTGCTG	30	71.1	aaactaaatctac	13	TCTAGATTGGATCTTGCTGGCGC	23	66	66	132
PDL2_ex7	chr9:5,570,132-5,570,183	GGGTTCCCTAAGGGTTGGA	19	cgctactactattagtagaattg	23	GAAACTTGCCCCTTCACTGATCTGGA	26	73.4	CTCACCTCTGGAGCCTATGGCTTTAA	26	71.2	atggtcaaactaaatctac	19	TCTAGATTGGATCTTGCTGGCGC	23	68	68	136
chr9q33.1	chr9:132,886,392-132,886,438	GGGTTCCCTAAGGGTTGGA	19	cgctactactattagtagaattg	23	GCTGGTTTGAACCCAACAGAGCTGCATG	28	77.4	GTCTCCCAGTAATCACATGGAAATGTAGACAC	32	72.4	tcaaactaaatctac	15	TCTAGATTGGATCTTGCTGGCGC	23	70	70	140
ctrl_3	chr17:3,397,657-3,397,712	GGGTTCCCTAAGGGTTGGA	19	cgctactactattagtagaattgatg	26	TCCCTGCGCCATTGAGGTCTATAAAAT	27	70.6	TATAGAGAAAGTTGATTACCCCCGGGATG	29	70.9	aatggtcaaactaaatctac	20	TCTAGATTGGATCTTGCTGGCGC	23	72	72	144
chr9p24.1	chr9:8,517,968-8,518,021	GGGTTCCCTAAGGGTTGGA	19	cgctactactattagtagaattgatgcc	28	GGCTGTCAGCTACATTGTGTTTCATCC	27	71.9	AGTTGTTGACATGTTGAGTGGGATCCA	27	71.1	atctaatggtcaaactaaatctac	24	TCTAGATTGGATCTTGCTGGCGC	23	74	74	148
chr9p22.1	chr9:19,515,344-19,515,395	GGGTTCCCTAAGGGTTGGA	19	cgctactactattagtagaattgatgccaccttt	34	TTGGTCAGGGTACTCTGGTGGAGGT	25	72.8	GGGCAGATAGTCTCTCTGTTTGGCTTG	27	72.9	atgtatctaatggtcaaactaaatctac	28	TCTAGATTGGATCTTGCTGGCGC	23	78	78	156
PDL1_ex1	chr9:5,450,545-5,450,586	GGGTTCCCTAAGGGTTGGA	19	cgctactactattagtagaattgatgccaccttttcagc	39	TCTGCGCAGCTTCCCGAGGCTC	22	76.8	CGCACCAGCCGCGCTTCTGT	20	76.8	atttgcgaaatgtatctaatggtcaaactaaatctac	37	TCTAGATTGGATCTTGCTGGCGC	23	80	80	160
chr9p21.1	chr9:32,987,566-32,987,612	GGGTTCCCTAAGGGTTGGA	19	cgctactactattagtagaattgatgccaccttttcag	38	CTTCTTTAGGGGCACAGAGCATTGG	25	72.2	CCAGAGTTGCTCCCAGGTTCCA	22	73.2	atttgcgaaatgtatctaatggtcaaactaaatctac	37	TCTAGATTGGATCTTGCTGGCGC	23	82	82	164
chr9p13.1	chr9:38,752,528-38,752,568	GGGTTCCCTAAGGGTTGGA	19	cgctactactattagtagaattgatgccaccttttcagctcgcgc	45	TCTGGGTCTGGAAGGGCTGC	20	71.6	GCCAGCCTGGCCTGCATCTGA	21	76.4	accatttgcgaaatgtatctaatggtcaaactaaatctac	40	TCTAGATTGGATCTTGCTGGCGC	23	84	84	168
ctrl_4	chr11:14,515,205-14,515,256	GGGTTCCCTAAGGGTTGGA	19	cgctactactattagtagaattgatgccaccttttcagctcgcg	44	TGCATGTTTGGAGCATCGACACA	23	70.4	GCTATGTTAGAAGAAATGCTGTTTTGGCC	29	70.5	tgcgaaatgtatctaatggtcaaactaaatctac	34	TCTAGATTGGATCTTGCTGGCGC	23	86	86	172
Legend:
5'PSS, 3'PSS - 5' and 3' primer-specific sequence, respectively
5'SS, 3'SS - 5' and 3' stuffer sequence, respectively
5'TSS, 3'TSS - 5' and 3' target-specific sequence, respectively
Tm - melting temperature
5'HPL, 3'HPL - 5' and 3' half-probe sequence
5'HPL, 3'HPL - 5' and 3' half-probe length
TPS, TPL - total probe sequence and length
SALSA PCR Forward primer (Labeled): *GGGTTCCCTAAGGGTTGGA
SALSA PCR Reverse primer (Unlabeled): GTGCCAGCAAGATCCAATCTAGA
Sequence used for generation of all 5' and 3' stuffer sequences: AC# V00604, Phage M13 genome, position 3-99
5'-cgctactactattagtagaattgatgccaccttttcagctcgcgccccaaatgaaaatatagctaaacaggttattgaccatttgcgaaatgtatctaatggtcaaactaaatctac-3'
