# Supplementary material for: Profile of Basal Cell Carcinoma Mutations and Copy Number Alterations - Focus on Gene-Associated Noncoding Variants
Source: Front Oncol. 2021 Nov 25;11:752579. doi: 10.3389/fonc.2021.752579 (PMC8656283; doi:10.3389/fonc.2021.752579)
Supplement: Supplementary file 4 [file Table_3.xlsx]

## Sheet: S3 Table
S3 Table. TCGA abbreviations and full cancer/project names.
Cancer_ID	Cancer type
ACC	Adrenal gland Adenomas and Adenocarcinomas
BLCA	Bladder Transitional Cell Papillomas and Carcinomas
BRCA	Brest Ductal and Lobular Neoplasms
CESC	Cervix uteri Squamous Cell Neoplasms
CHOL	Liver and intrahepatic bile ducts Adenomas and Adenocarcinomas
COAD	Colon Adenomas and Adenocarcinomas
DLBC	Lymphoid Neoplasm Diffuse Large B-cell Lymphoma
ESCA	Esophagus Squamous Cell Neoplasms
GBM	Glioblastoma Multiforme
HNSC	Head and neck Squamous Cell Neoplasms
KICH	Kidney Adenomas and Adenocarcinomas
KIRC	Kidney Adenomas and Adenocarcinomas
KIRP	Kidney Adenomas and Adenocarcinomas
LAML	Acute Myeloid Leukemia
LGG	Low Grade Glioma
LIHC	Liver and intrahepatic bile ducts Adenomas and Adenocarcinomas
LUAD	Lung Adenocaricnomas
LUSC	Lung ASquamous Cell Neoplasms
MESO	Mesothelioma
OV	Ovary Cystic, Mucinous and Serous Neoplasms
PAAD	Pancreas Ductal and Lobular Neoplasms
PCPG	Pheochromocytoma and Paraganglioma
PRAD	Adrenal gland Adenomas and Adenocarcinomas
READ	Rectum Adenomas and Adenocarcinomas
SARC	Sarcoma
SKCM	Skin Cutaneous Melanoma
STAD	Stomach Adenomas and Adenocarcinomas
TGCT	Testicular Germ Cell Tumors
THCA	Thyroid gland Adenomas and Adenocarcinomas
THYM	Thymic Epithelial Neoplasms
UCEC	Uterine Corpus Endometrial Carcinoma
UCS	Uterine carcinosarcoma
UVM	Eye and adnexa Nevi and Melanomas
