# Supplementary material for: Profile of Basal Cell Carcinoma Mutations and Copy Number Alterations - Focus on Gene-Associated Noncoding Variants
Source: Front Oncol. 2021 Nov 25;11:752579. doi: 10.3389/fonc.2021.752579 (PMC8656283; doi:10.3389/fonc.2021.752579)
Supplement: Supplementary file 6 [file Table_5.xlsx]

## Sheet: S5 Table
S5 Table. List of somatic mutations validated by Sanger sequencing.
substitutions	Gene_ID	Position of mutation	Mutation	Alternative allele fraction	No. of analyzed samples	Mutation validation
	SCNM1	chr1:151,168,176	C>T	0.09	1	yes
	FLG2	chr1:152,350,960	G>A	0.29	1	yes
	FLG2	ch1:152,353,014	C>T	0.26	1	yes
	FLG2	chr1:152,354,686	G>A	0.32;0.35	2	yes
	RPS27	chr1:153,990,763	C>T	0.17;0.38;0.46	3	yes
	DYRK3	chr1:206,648,309	C>T	0.07;0.09	2	yes
	MYCN	chr2:15,942,194	CC>TT	0.18;0.37	2	yes
	MYCN	chr2:15,942,195	C>T	0.19;0.23	2	yes
	MYCN	chr2:15,942,240	C>T	0.38	1	yes
	MYCN	chr2:15,945,676	C>T	0.38	1	yes
	MYCN	chr2:15,945,997	CC>TT	0.07	1	no
	PTCH1	chr9:95,459,622	G>T	0.61;0.77	2	yes
	PTCH1	chr9:95,469,014	G>A	0.11;0.13	2	yes
	PTCH1	chr9:95,480,502	C>T	0.82	1	yes
	AMBRA1	chr11:46,433,601	G>A	0.05	1	yes
	AMBRA1	chr11:46,435,033	GG>AA	0.36	1	yes
	BAD	chr11:64,270,066	G>T	0.2	1	yes
	BAD	chr11:64,270,066	G>A	0.05;0.07;0.23;0.32	4	yes
	BAD	chr11:64,270,066	GG>AA	0.06;0.4	2	yes
	BAD	chr11:64,270,067	G>A	0.08	1	yes
	DHODH	chr16:72,008,760	GG>AA	0.11;0.19,0.25;0.46	4	yes
	DHODH	chr16:72,008,760	G>A	0.08	1	yes
	TP53	chr17:7,676,071	G>A	0.29	1	yes
	MISP	chr19:757,463	C>T	0.11	1	yes
indels	CASZ1	chr1:10,659,766	A>AT	0.22	1	yes
	TCHH	chr1:152,110,315	GC>G	0.28	1	yes
	BIRC6	chr2:32,464,744	AGC>A	0.25	1	yes
	TTN	chr2:178,536,516	CA>C	0.32	1	yes
	SCAP	chr3:47,413,919	C>CA	0.24	1	yes
	HERC5	chr4:88,463,980	TG>T	0.28	1	yes
	KCNN2	chr5:114,473,131	C>CA	0.41	1	yes
	IBTK	chr6:82,227,236	CA>C	0.18	1	yes
	ADGB	chr6:146,672,360	GA>G	0.32	1	yes
	SSPO	chr7:149,779,582	C>CT	0.38	1	yes
	PTCH1	chr9:95,477,628	GAC>G	0.33	1	yes
	ALG10B	chr12:38,320,258	CTA>C	0.3	1	yes
	FRMPD3	chrX:107,598,126	AC>A	0.34	1	yes
