# Supplementary material for: Profile of Basal Cell Carcinoma Mutations and Copy Number Alterations - Focus on Gene-Associated Noncoding Variants
Source: Front Oncol. 2021 Nov 25;11:752579. doi: 10.3389/fonc.2021.752579 (PMC8656283; doi:10.3389/fonc.2021.752579)
Supplement: Supplementary file 7 [file Table_6.xlsx]

## Sheet: S6 Table
S6 Table. List of hotspot mutations.
Position of mutation	Mutation	Localization	Gene_ID	No. (%) of mutated samples	Effect on protein	CGC
chr11:64,270,066-64,270,067	G>A;GG>AA;G>T	3UTR	BAD	8(29,6)	-	-
chr14:103,131,144	C>T	coding sequence	TNFAIP2	5(18,5)	missense; Ser431Phe; Sec6 domain (Exocyst complex component Sec6)	-
chr15:57,706,717	C>T	5UTR/intron	POLR2M/ GCOM1	5(18,5)	-	-
chr16:72,008,760-72,008,761	G>A;GG>AA	5UTR	DHODH	5(18,5)	-	-
chr1:19,596,899	G>A	intron	MICOS10	4(14,8)	-	-
chr4:47,463,639	C>T	coding sequence	COMMD8	4(14,8)	missense; Glu5Lys	-
chr7:56,106,490	G>A	5UTR	CHCHD2	4(14,8)	-	-
chr9:32,552,281	G>A	intron/5UTR	TOPORS/SMIM27	4(14,8)	-	-
chr12:110,450,362-110,450,363	G>A;GG>AA	5UTR	ARPC3	4(14,8)	-	-
chr16:2,460,094-2,460,095	G>A;GG>AA	5UTR	TEDC2	4(14,8)	-	-
chr18:23,586,506-23,586,507	G>A;GG>AA	5UTR	NPC1	4(14,8)	-	-
chr19:3,788,7566	C>T	coding sequence	WDR87	4(14,8)	synonymous; Arg2035Arg	-
chr1:20,090,617	C>T	coding sequence	PLA2G5	3(11,1)	synonymous; Leu114Leu; PLA2c domain (Phospholipase A2, a family of secretory and cytosolic enzymes)	-
chr1:99,306,852	G>A	coding sequence	PLPPR4	3(11,1)	missense; Glu712Lys	-
chr1:103,432,947	C>T	coding sequence	LOC101928436	3(11,1)	missense; Gly39Glu	-
chr1:153,990,763	C>T	5UTR	RPS27	3(11,1)	-	-
chr1:155,965,725	G>A	coding sequence	ARHGEF2	3(11,1)	missense; Pro99Ser	-
chr2:28,628,556	C>T	intron	PLB1	3(11,1)	-	-
chr2:33,397,321	C>T	intron	LTBP1	3(11,1)	-	-
chr3:26,710,432	G>A	coding sequence	LRRC3B	3(11,1)	missense; Asp254Asn	-
chr3:121,928,459	C>T	coding sequence	SLC15A2	3(11,1)	synonymous; Phe415Phe; PTR2 domain (POT family)	-
chr4:68,069,918	C>T	intron	UBA6-AS1	3(11,1)	-	-
chr5:140,863,551	G>A	intron	PCDHA3	3(11,1)	-	-
chr6:36,961,899	G>A	coding sequence	PI16	3(11,1)	missense; Gly173Arg	-
chr6:69,339,554	C>T	intron	BAI3	3(11,1)	-	-
chr6:118,565,500-118,565,501	G>A;GG>AA	intron	CEP85L	3(11,1)	-	-
chr6:165,301,652	C>T	coding sequence	Q8TC11/C6orf118	3(11,1)	missense; Glu224Lys	-
chr7:143,935,997	G>A	coding sequence	OR2F2	3(11,1)	synonymous; Thr255Thr; 7tm_1(7 transmembrane receptor domain)	-
chr7:148,827,237	G>A	coding sequence	EZH2	3(11,1)	missense; Pro219Ser; PRC2_HTH_1 (Polycomb repressive complex 2 tri-helical domain)	yes
chr9:8,451,932	C>T	intron	PTPRD	3(11,1)	-	-
chr9:136,979,271	C>T	coding sequence	PTGDS	3(11,1)	synonymous; Ser101Ser; Lipocalin / cytosolic fatty-acid binding protein family	-
chr10:67,097,691	G>A	coding sequence	LRRTM3	3(11,1)	synonymous; Thr547Thr	-
chr12:10,160,032	G>A	intron	OLR1	3(11,1)	-	-
chr13:36,695,128	G>A	coding sequence	SERTM1	3(11,1)	missense; Gly17Glu; SRTM1 (Serine-rich and transmembrane domain-containing protein 1)	-
chr15:24,676,062	C>T	coding sequence	NPAP1	3(11,1)	synonymous; Phe65Phe	-
chr15:40,382,906-40,382,907	C>T;CC>TT	coding sequence	KNSTRN	3(11,1)	missense; Ser24Phe	-
chr15:50,482,094	G>C/A	intron	USP8	3(11,1)	-	yes
chr15:74,615,846	G>A	coding sequence	CLK3	3(11,1)	missense; Arg131Lys	-
chr16:4,813,725	G>A	intron	GLYR1	3(11,1)	-	-
chr17:35,441,269	G>A	coding sequence	SLFN13	3(11,1)	missense; Arg674Cys; P-loop_NTPase (P-loop containing Nucleoside Triphosphate Hydrolases)	-
chr17:44,355,031	G>A	coding sequence	FAM171A2	3(11,1)	-	-
chr19:4,513,208	C>T	coding sequence	PLIN4	3(11,1)	missense; Gly252Val	-
chrX:135,868,028	G>A	coding sequence	CT45A9	3(11,1)	missense; Pro12Ser	-
