# Supplementary material for: Profile of Basal Cell Carcinoma Mutations and Copy Number Alterations - Focus on Gene-Associated Noncoding Variants
Source: Front Oncol. 2021 Nov 25;11:752579. doi: 10.3389/fonc.2021.752579 (PMC8656283; doi:10.3389/fonc.2021.752579)
Supplement: Supplementary file 8 [file Table_7.xlsx]

## Sheet: coding sequence
S7 Table. List of frequently mutated genes.
Gene_ID	No. of mutations	No. of mutated samples	CGC	Driver gene
PTCH1	24	20	yes	yes
PCDHA1	78	17	-	-
USH2A	27	16	-	-
GPR98	34	16	-	-
SYNE1	29	16	-	-
PKHD1L1	22	15	-	-
FSIP2	30	15	-	-
MUC5B	22	15	-	-
APOB	28	14	-	-
XIRP2	19	14	-	-
PCDHGA1	36	14	-	-
ZNF469	29	14	-	-
PTPRD	19	13	yes	-
PKHD1	16	13	-	-
TP53	16	13	yes	yes
ANK3	18	12	-	-
IGFN1	19	12	-	-
RP1	19	12	-	-
PCDH15	19	12	-	-
EYS	25	12	-	-
GRIN2A	17	11	yes	-
FAT4	16	11	yes	-
DIP2A	13	11	-	-
PKD1	11	11	-	-
DCHS2	17	11	-	-
MUC17	12	11	-	-
DNAH7	17	11	-	-
RIMS1	13	11	-	-
MYO15A	16	11	-	-
ABCA13	17	11	-	-
RYR1	15	10	-	-
MLL2	19	10	-	-
CSMD2	14	10	-	-
BAI3	12	10	-	-
ACAN	17	10	-	-
PREX1	10	10	-	-
DSCAM	16	10	-	-
DNAH9	17	10	-	-
FBN1	12	10	-	-
NRG3	12	10	-	-
FLG	15	10	-	-
NEFM	11	10	-	-
MAGEC1	20	10	-	-
RELN	16	10	-	-
SI	13	10	-	-
CACNA1H	15	10	-	-
PRUNE2	12	10	-	-
FAM135B	15	10	yes	-
ZFHX4	13	9	-	-
SIPA1L2	10	9	-	-
LRRC7	12	9	-	-
MYOCD	13	9	-	-
HDAC9	14	9	-	-
FLG2	9	9	-	-
AHNAK2	14	9	-	-
HEATR7B2	14	9	-	-
FREM2	13	9	-	-
BNC2	10	9	-	-
TAF1L	13	9	-	-
KDR	10	9	yes	-
MYH13	10	9	-	-
SLIT2	12	9	-	-
THSD7A	13	9	-	-
VPS13B	12	9	-	-
SCN9A	12	9	-	-
STAB2	11	9	-	-
FREM1	14	9	-	-
WDFY4	9	9	-	-
KANK4	9	9	-	-
PXDNL	12	9	-	-
LPA	13	9	-	-
POM121L12	9	9	-	-
KIAA1211	12	9	-	-
SVEP1	13	9	-	-
CMYA5	37	9	-	-
NOTCH1	10	8	yes	-
CKAP5	9	8	-	-
SLC8A3	8	8	-	-
MYCN	8	8	yes	-
AHNAK	12	8	-	-
TDRD6	11	8	-	-
FMN2	11	8	-	-
ZFYVE26	9	8	-	-
ARHGAP35	9	8	-	-
NEB	14	8	-	-
RREB1	14	8	-	-
GRM8	13	8	-	-
BIRC6	9	8	yes	-
KIAA1109	13	8	-	-
GREB1	11	8	-	-
MED12L	8	8	-	-
DLC1	9	8	-	-
VWF	9	8	-	-
WDR87	11	8	-	-
ZNF804B	19	8	-	-
NLRP12	9	8	-	-
MYO7B	12	8	-	-
TEP1	11	8	-	-
KLHL4	8	8	-	-
CNGB1	9	8	-	-
PLEC	8	8	-	-
NAV3	9	8	-	-
GPR112	18	8	-	-
MYEF2	8	8	-	-
TTBK2	9	8	-	-
CASS4	9	8	-	-
RP1L1	12	8	-	-
ZFHX3	10	8	yes	-
NES	13	8	-	-
KIAA1210	9	8	-	-
ALPK2	10	8	-	-
LRRK2	9	8	-	-
SRRM2	9	8	-	-
DIDO1	8	8	-	-
SPHKAP	10	8	-	-
KNDC1	11	8	-	-
ZNF831	11	8	-	-
SPTA1	16	8	-	-
NACA	10	8	yes	-
NOTCH2	8	7	yes	-
SLC4A9	8	7	-	-
FAT2	7	7	-	-
TMEM132D	9	7	-	-
CRB1	9	7	-	-
CILP2	10	7	-	-
UNC80	8	7	-	-
PLCL1	7	7	-	-
HCN1	8	7	-	-
DOCK10	9	7	-	-
MBD5	9	7	-	-
SHANK1	10	7	-	-
ATRNL1	8	7	-	-
FSTL5	9	7	-	-
RNU6-28	7	7	-	-
FBN2	12	7	-	-
NPAP1	9	7	-	-
ODZ1	10	7	-	-
CELSR3	10	7	-	-
CACNA1A	10	7	-	-
SPAG17	8	7	-	-
MYO18B	11	7	-	-
SEZ6L	8	7	-	-
EPHA5	7	7	-	-
PDE10A	7	7	-	-
LRP1	8	7	-	-
LAMA2	7	7	-	-
ABCA6	7	7	-	-
MYO16	8	7	-	-
ZNF521	7	7	yes	-
CELSR2	9	7	-	-
PSME4	7	7	-	-
UBR4	7	7	-	-
CUBN	8	7	-	-
PCDHB6	9	7	-	-
LPPR4	7	7	-	-
ST18	7	7	-	-
CXorf22	10	7	-	-
NALCN	9	7	-	-
ANK2	8	7	-	-
TRIOBP	12	7	-	-
MYOM3	11	7	-	-
ABCA7	8	7	-	-
SPTBN2	8	7	-	-
ASXL3	7	7	-	-
CUX2	7	7	-	-
STARD9	8	7	-	-
MDN1	11	7	-	-
ZNF541	8	7	-	-
ACACB	7	7	-	-
NWD1	7	7	-	-
FRY	8	7	-	-
NLRC5	10	7	-	-
MYO1H	8	7	-	-
MACF1	7	7	-	-
PCDHB16	9	7	-	-
C7	10	7	-	-
MRC1	7	7	-	-
EPG5	7	7	-	-
VWDE	7	7	-	-
CFH	8	7	-	-
HIVEP3	7	7	-	-
SH2D7	7	7	-	-
MEFV	9	7	-	-
PRRC2C	9	7	-	-
FNDC1	8	7	-	-
PLCE1	10	7	-	-
FCGBP	11	7	-	-
WDR33	8	7	-	-
PPP1R3A	8	7	-	-
ALMS1	17	7	-	-
AK5	8	6	-	-
ADCY8	7	6	-	-
ZNF536	7	6	-	-
ZIM2	9	6	-	-
GCN1L1	6	6	-	-
PTPRF	6	6	-	-
FAM59A	6	6	-	-
TG	8	6	-	-
CHRNA9	6	6	-	-
SACS	8	6	-	-
IL16	8	6	-	-
ADAMTS20	11	6	-	-
SLC4A4	8	6	-	-
CDKL5	7	6	-	-
SORL1	6	6	-	-
CYP17A1	6	6	-	-
HMCN1	7	6	-	-
ADCY1	6	6	-	-
RNU6-71	13	6	-	-
ZMAT4	6	6	-	-
NELL2	6	6	-	-
HUWE1	6	6	-	-
SPTB	7	6	-	-
MDGA2	7	6	-	-
AATK	7	6	-	-
ZEB1	6	6	yes	-
BRD4	6	6	yes	-
ODZ4	6	6	-	-
MLL	7	6	-	-
ROBO3	7	6	-	-
URGCP-MRPS24	6	6	-	-
NOS1	6	6	-	-
ANKRD30A	8	6	-	-
ZNF208	6	6	-	-
NPR1	7	6	-	-
TPTE	6	6	-	-
ROS1	9	6	yes	-
CPS1	6	6	-	-
LRRC3B	6	6	-	-
PRDM16	7	6	yes	-
DCC	8	6	yes	-
UNC13C	8	6	-	-
OPCML	6	6	-	-
SPEG	6	6	-	-
EPHA10	11	6	-	-
CNTNAP2	6	6	yes	-
SLC8A1	8	6	-	-
MYO9A	6	6	-	-
SPEN	7	6	yes	-
EPHA3	8	6	yes	-
FLNC	7	6	-	-
MAP2	6	6	-	-
EPB41L3	6	6	-	-
NYAP2	7	6	-	-
LRBA	6	6	-	-
ZNF609	6	6	-	-
SYNE2	9	6	-	-
ABCA4	7	6	-	-
DMXL2	6	6	-	-
ULK1	6	6	-	-
EPHA6	8	6	-	-
FAM75D1	6	6	-	-
TEX11	6	6	-	-
SLCO1C1	8	6	-	-
GRIN3A	6	6	-	-
PTPRZ1	8	6	-	-
TNFAIP2	6	6	-	-
HCFC1	7	6	-	-
HECTD1	7	6	-	-
PCDHB8	9	6	-	-
TEX15	9	6	-	-
FRMPD4	9	6	-	-
TTC21A	10	6	-	-
PLIN4	8	6	-	-
NRAP	13	6	-	-
ZMIZ1	6	6	-	-
IGSF10	8	6	-	-
SIGLEC1	7	6	-	-
HEATR8-TTC4	7	6	-	-
PCDH9	6	6	-	-
SLFN13	6	6	-	-
PKD1L1	10	6	-	-
GRIN2B	6	6	-	-
CHD4	6	6	yes	-
PRIC285	8	6	-	-
CHD5	9	6	-	-
TTLL6	6	6	-	-
CD163L1	9	6	-	-
TIE1	6	6	-	-
AKD1	7	6	-	-
LEPR	8	6	-	-
FAM186A	10	6	-	-
RASGRP3	8	6	-	-
ZNF804A	7	6	-	-
FREM3	6	6	-	-
TRANK1	7	6	-	-
KIF6	7	6	-	-
CFHR5	6	6	-	-
ATP10B	8	6	-	-
ITGAM	7	6	-	-
CC2D1A	7	6	-	-
CEP112	6	6	-	-
TRIO	6	6	-	-
KCNH8	6	6	-	-
TMPRSS11F	7	6	-	-
FAT1	12	6	yes	-
F5	9	6	-	-
REV3L	7	6	-	-
AXDND1	8	6	-	-
WDR7	6	6	-	-
INADL	6	6	-	-
CPAMD8	12	6	-	-
FCRL5	7	6	-	-
KLC1	7	6	-	-
ZEB2	6	6	-	-
CDYL2	6	6	-	-
CDH9	7	6	-	-
AKAP13	7	6	-	-
VGLL3	6	6	-	-
DOCK5	6	6	-	-
MYBPC3	6	6	-	-
CYP4A11	6	6	-	-
PPP1R9A	9	6	-	-
PKDREJ	7	6	-	-
POLQ	9	6	yes	-
FCRL4	6	6	yes	-
GPRIN1	6	6	-	-
MLL4	7	6	-	-
SLC22A25	7	6	-	-
AHRR	6	6	-	-
GNAS	9	6	yes	-
ANKRD24	6	6	-	-
PIGQ	8	6	-	-
KDM4C	8	6	-	-
BANK1	9	6	-	-
C14orf39	7	6	-	-
FOXR2	6	6	-	-
GPR158	7	6	-	-
TGFB1I1	5	5	-	yes
CARD6	5	5	-	yes
CTNND2	6	5	yes	-
PCDH7	5	5	-	-
FLNA	7	5	yes	-
NOS3	5	5	-	-
FSHR	6	5	-	-
CNGA3	6	5	-	-
A1CF	5	5	yes	-
FLNB	8	5	-	-
DNAH3	8	5	-	-
ADCY4	5	5	-	-
PYGB	6	5	-	-
NELL1	5	5	-	-
SYNPO	10	5	-	-
SYT3	5	5	-	-
SLC36A2	5	5	-	-
CREBBP	7	5	yes	-
CTNNA3	6	5	-	-
SETD1A	5	5	-	-
DDX60L	8	5	-	-
CNBD1	5	5	yes	-
MYH7	7	5	-	-
NCAN	7	5	-	-
CREB3L4	7	5	-	-
DNMT3B	5	5	-	-
CELSR1	6	5	-	-
MAEL	5	5	-	-
TMPRSS11B	5	5	-	-
NCKAP5L	5	5	-	-
LATS1	6	5	yes	-
ABCB5	5	5	-	-
MYH3	6	5	-	-
C16orf96	7	5	-	-
OTOL1	5	5	-	-
ADAMTS7	5	5	-	-
TIMELESS	5	5	-	-
PDE6C	5	5	-	-
PLXNC1	7	5	-	-
FZD9	5	5	-	-
ZNF318	6	5	-	-
SHROOM2	5	5	-	-
MATN4	5	5	-	-
KANK1	9	5	-	-
MYO3B	5	5	-	-
BRWD3	8	5	-	-
XKR4	5	5	-	-
SDK2	6	5	-	-
TNIK	5	5	-	-
TLN1	6	5	-	-
FAM5B	6	5	-	-
TANC1	5	5	-	-
TECTA	5	5	-	-
PBRM1	5	5	yes	-
CHD7	8	5	-	-
RBP3	6	5	-	-
NEBL	8	5	-	-
BSN	6	5	-	-
FAM194A	6	5	-	-
PCDH1	10	5	-	-
TRPM3	7	5	-	-
GRIA2	5	5	-	-
DYNC1H1	5	5	-	-
FAM171A1	6	5	-	-
DNAJC13	5	5	-	-
BCL9L	6	5	yes	-
KIF1A	5	5	-	-
DLG2	5	5	-	-
DCAF4	5	5	-	-
KIAA0240	5	5	-	-
BAI2	5	5	-	-
DCAF4L2	5	5	-	-
BRD1	5	5	-	-
RHOT2	8	5	-	-
GRIK2	5	5	-	-
AR	5	5	yes	-
CADPS	6	5	-	-
CACNA1F	6	5	-	-
PRDM14	5	5	-	-
FAM135A	7	5	-	-
GRIK4	5	5	-	-
ABCC11	8	5	-	-
ATP13A1	5	5	-	-
PLXNA3	6	5	-	-
CADPS2	6	5	-	-
FAM155A	5	5	-	-
RBMXL2	5	5	-	-
AKAP6	6	5	-	-
ADAMTS19	6	5	-	-
IRS2	6	5	-	-
C6	7	5	-	-
ARFGEF2	5	5	-	-
SAMD9L	5	5	-	-
EPHA8	7	5	-	-
GIN1	5	5	-	-
UBASH3A	5	5	-	-
IVL	5	5	-	-
ANKRD11	5	5	-	-
TACC2	6	5	-	-
DIRC2	5	5	-	-
CNKSR2	6	5	-	-
CEACAM8	5	5	-	-
UGT2B11	8	5	-	-
RGS11	6	5	-	-
SPATA20	5	5	-	-
CDH23	5	5	-	-
ITGAX	5	5	-	-
UMODL1	10	5	-	-
USP26	6	5	-	-
DAB2	5	5	-	-
PCDHB4	6	5	-	-
ZSCAN10	5	5	-	-
ARID1A	5	5	yes	-
RBM19	5	5	-	-
FBXO40	5	5	-	-
PRKCB	5	5	yes	-
PDE3A	5	5	-	-
ARHGEF2	6	5	-	-
NLRP5	9	5	-	-
DOT1L	6	5	-	-
MYH8	5	5	-	-
SYT16	5	5	-	-
CCDC155	5	5	-	-
NBAS	5	5	-	-
ALOX15B	6	5	-	-
SIM1	5	5	-	-
F8	6	5	-	-
MMRN2	7	5	-	-
RIMS2	6	5	-	-
L1CAM	8	5	-	-
DNAH6	6	5	-	-
ROBO1	6	5	-	-
ADAMTSL3	6	5	-	-
SLFN5	6	5	-	-
ARID1B	6	5	yes	-
ROR1	6	5	-	-
INTS5	6	5	-	-
MYO3A	5	5	-	-
EIF2AK3	5	5	-	-
MYLK3	5	5	-	-
PTPN21	6	5	-	-
TLN2	6	5	-	-
GPR123	6	5	-	-
NBEA	5	5	yes	-
ATP2C2	6	5	-	-
KALRN	6	5	-	-
FLT4	6	5	yes	-
NCOA3	5	5	-	-
SMCHD1	5	5	-	-
MEIS2	6	5	-	-
BCORL1	6	5	yes	-
GREB1L	5	5	-	-
TGM6	5	5	-	-
C6orf118	6	5	-	-
GPR128	5	5	-	-
SLC4A10	6	5	-	-
FAM5C	5	5	-	-
MSH4	5	5	-	-
STARD13	5	5	-	-
TRIP11	6	5	yes	-
EYA2	5	5	-	-
MEGF8	7	5	-	-
RTTN	5	5	-	-
KCNT2	6	5	-	-
IHH	5	5	-	-
ARHGEF10L	6	5	yes	-
NOTCH3	6	5	-	-
RADIL	7	5	-	-
ADAMTS12	6	5	-	-
ATP13A5	6	5	-	-
FAM71B	5	5	-	-
CDON	8	5	-	-
PIK3CG	6	5	-	-
ADGB	5	5	-	-
BCHE	6	5	-	-
VPS13A	5	5	-	-
SHROOM3	7	5	-	-
ATP13A4	5	5	-	-
ZC3HC1	6	5	-	-
FSCB	7	5	-	-
TRPM5	5	5	-	-
DCAF8L1	5	5	-	-
MANBA	5	5	-	-
WWC2	5	5	-	-
VWA3B	8	5	-	-
ITGAD	5	5	-	-
C1orf173	5	5	-	-
CACNA1E	5	5	-	-
LCP2	5	5	-	-
SNED1	5	5	-	-
EML5	5	5	-	-
IBSP	6	5	-	-
PTPRN	7	5	-	-
MYH4	10	5	-	-
CNTN3	6	5	-	-
NYNRIN	6	5	-	-
METTL11B	6	5	-	-
FAM47A	6	5	-	-
PCDHB5	6	5	-	-
TCHH	5	5	-	-
ABCA9	5	5	-	-
TMEM232	5	5	-	-
ABCC8	5	5	-	-
DPP10	6	5	-	-
GAA	5	5	-	-
ATRX	5	5	yes	-
DHX34	5	5	-	-
PRSS38	5	5	-	-
GLI2	5	5	-	-
CCDC88C	7	5	-	-
CCDC129	5	5	-	-
PTGFR	5	5	-	-
RTL1	5	5	-	-
PEAR1	5	5	-	-
MAMLD1	9	5	-	-
FRYL	5	5	-	-
PRRC2B	7	5	-	-
NHS	5	5	-	-
HHIPL2	5	5	-	-
OTOF	8	5	-	-
PCYOX1L	6	5	-	-
PTPRB	6	5	yes	-
GABRE	7	5	-	-
CCDC88B	6	5	-	-
TSPEAR	6	5	-	-
KLHDC7A	12	5	-	-
MAGEC3	14	5	-	-
ANKRD30B	5	5	-	-
KIAA2026	5	5	-	-
SGIP1	7	5	-	-
SPEF2	8	5	-	-
TNRC18	7	5	-	-
PTPN13	7	5	yes	-
STOX1	7	5	-	-
NLRP4	6	5	-	-
HGF	9	5	-	-
BLM	6	5	yes	-
OAS3	5	5	-	-
SPOCD1	5	5	-	-
ATP8B4	6	5	-	-
FN1	6	5	-	-
CCDC79	5	5	-	-
BPIFB6	5	5	-	-
TCP11L1	5	5	-	-
LAD1	5	5	-	-
BTN1A1	6	5	-	-
ATP1A1	5	5	yes	-
PARP14	7	5	-	-
MKI67	23	5	-	-
TCP11	5	5	-	-
SLC6A16	5	5	-	-
HELB	6	5	-	-
EP400	5	5	-	-
DYNC2H1	7	5	-	-
TNN	6	5	-	-
STAB1	5	5	-	-
LAMC3	5	5	-	-
WNK1	5	5	-	-
FSTL4	5	5	-	-
TTBK1	6	5	-	-
ADAM7	5	5	-	-
USP29	5	5	-	-
REXO1	7	5	-	-
CD93	5	5	-	-
ADAMTS2	5	5	-	-
PSG6	5	5	-	-
GLIS3	6	5	-	-
NCOR2	5	5	yes	-
C10orf71	15	5	-	-
VCAN	7	5	-	-
WDR17	6	5	-	-
KIAA1107	6	5	-	-
C12orf35	9	5	-	-
NACAD	8	5	-	-
STK11IP	5	5	-	-
MS4A14	6	5	-	-
JMJD1C	7	5	-	-
MUC12	9	5	-	-

## Sheet: 5UTR
Supplementary Table S5. The list of frequently mutated genes
Gene_ID	No. of mutations	No. of mutated samples	CGC	Driver gene
CHCHD2	6	6	-	yes
DHODH	5	5	-	yes
POLR2M	5	5	-	yes
PES1	4	4	-	-
RPL18	4	4	-	-
NPC1	4	4	-	yes
PPME1	4	4	-	-
SPHK2	4	4	-	yes
AIM1	4	4	-	-
COL6A4P1	6	4	-	-
NELL2	4	4	-	yes

## Sheet: 3UTR
Supplementary Table S5. The list of frequently mutated genes
Gene_ID	No. of mutations	No. of mutated samples	CGC	Driver gene
MUC19	43	15	-	-
BAD	8	8	-	yes
TOPORS-AS1	8	7	-	yes
OPRM1	5	5	-	-
RBM48	5	4	-	-
C4orf17	5	5	-	-
PHKG2	4	4	-	-
FCRL5	5	4	-	-
TEX35	5	4	-	-
ZNF780B	4	4	-	-
C19orf54	4	4	-	-

## Sheet: introns40nt
Supplementary Table S5. The list of frequently mutated genes
Gene_ID	No. of mutations	No. of mutated samples	CGC	Driver gene
COL22A1	18	13	-	-
BMS1P20	20	11	-	-
AF088750	20	11	-	-
HMCN1	17	11	-	-
ABCA13	17	10	-	-
COL5A3	23	10	-	-
SPTA1	16	10	-	-
CTC-297N7.11	24	10	-	-
RYR1	13	10	-	-
STAB2	11	9	-	-
DNAH9	12	9	-	-
SLIT1	9	9	-	-
BOLA2B	15	9	-	-
LTBP1	10	9	-	-
PTPRD	14	9	yes	-
KALRN	12	9	-	-
PPFIA4	11	9	-	-
SI	10	9	-	-
COL19A1	20	9	-	-
CCDC88B	10	8	-	-
PKHD1L1	9	8	-	-
UNC13A	8	8	-	-
USP24	8	8	-	-
PCDH15	11	8	-	-
CACNA1H	14	8	-	-
NALCN	10	8	-	-
JAKMIP1	8	8	-	-
MUC19	19	8	-	-
AMPH	8	8	-	-
COL13A1	9	8	-	-
CACNA2D4	9	8	-	-
FBN2	10	8	-	-
FBN3	17	8	-	-
HSPG2	9	8	-	-
NPIPB7	8	8	-	-
LUC7L	13	8	-	-
NPHS1	11	8	-	-
PTPN14	8	7	-	-
ATG2A	8	7	-	-
SYNE1	8	7	-	-
NUP210L	7	7	-	-
STAB1	9	7	-	-
UNC80	10	7	-	-
SPATA20	7	7	-	-
DIP2A	7	7	-	-
CPAMD8	10	7	-	-
RIMS2	7	7	-	-
MYH1	8	7	-	-
SPIRE2	7	7	-	-
MED12L	9	7	-	-
FAM135B	12	7	yes	-
COL27A1	8	7	-	-
DIP2B	7	7	-	-
LRP1	7	7	-	-
TRDN	8	7	-	-
TLN1	8	7	-	-
C20orf26	9	7	-	-
SLIT2	9	7	-	-
MIR548F1	21	7	-	-
NOTCH2	6	6	yes	-
KIF1A	7	6	-	-
MAT1A	6	6	-	-
ZMIZ2	6	6	-	-
PTCHD2	7	6	-	-
ROS1	7	6	-	-
TTN-AS1	8	6	-	-
STXBP2	7	6	-	-
MPDZ	7	6	-	-
PCSK4	6	6	-	-
TMEM63C	8	6	-	-
SORL1	7	6	-	-
PTPRH	6	6	-	-
TJP3	6	6	-	-
PXDNL	7	6	-	-
MYO1C	8	6	-	-
CACNA1A	7	6	-	-
ERBB4	7	6	yes	-
ITPR1	6	6	-	-
ATP11A	7	6	-	-
DNAH17	9	6	-	-
NOS1	6	6	-	-
MACF1	6	6	-	-
BMX	6	6	-	-
ARL17A	6	6	-	-
COL7A1	6	6	-	-
ASTN1	8	6	-	-
COL9A2	12	6	-	-
ADAMTS13	6	6	-	-
CADPS2	8	6	-	-
MCF2	7	6	-	-
PLCB1	6	6	-	-
SNX8	6	6	-	-
USH2A	9	6	-	-
FLNC	8	6	-	-
TMEM63B	6	6	-	-
BCYRN1	11	6	-	-
DNAH8	13	6	-	-
UBR4	8	6	-	-
COL4A4	8	6	-	-
THADA	6	6	-	-
COL1A1	13	6	yes	-
AOX1	7	6	-	-
COL4A6	6	6	-	-
TACC3	10	6	-	-
VAV2	9	6	-	-
ITGA7	6	6	-	-
CUBN	10	6	-	-
AZI1	8	6	-	-
ADAM11	6	6	-	-
SLC5A5	6	6	-	-
TRPM5	9	6	-	-
ABCC8	6	6	-	-
COL4A1	8	6	-	-
COL16A1	10	6	-	-
ABCA2	11	6	-	-
FCRL2	9	6	-	-
MADD	8	6	-	-
FER1L5	6	6	-	-
PPFIA2	7	6	-	-
HERC1	11	6	-	-
COL5A1	15	6	-	-
FRAS1	9	6	-	-
PLB1	8	6	-	-
PCCA	6	6	-	-
ADAMTSL1	8	6	-	-
CTD-3222D19.2	8	6	-	-
DNAH2	7	6	-	-
PHACTR2	5	5	-	-
PTCH1	8	5	yes	-
CHIT1	6	5	-	-
LRRC16B	5	5	-	-
CAMTA1	5	5	yes	-
PCDHA1	5	5	-	-
PCDHA2	5	5	-	-
PCDHA3	5	5	-	-
DOPEY2	5	5	-	-
MYH13	5	5	-	-
PCDHA4	5	5	-	-
FARP1	6	5	-	-
PCDHA6	5	5	-	-
PCDHA5	5	5	-	-
PCDHA7	5	5	-	-
FER1L4	5	5	-	-
PCDHA8	5	5	-	-
SSPO	11	5	-	-
NELL2	7	5	-	-
MAST1	5	5	-	-
PCDHA9	5	5	-	-
PADI4	6	5	-	-
PCDHA10	5	5	-	-
CNGB1	6	5	-	-
CLCNKA	6	5	-	-
TEX35	5	5	-	-
KPTN	5	5	-	-
RELN	5	5	-	-
WDFY4	6	5	-	-
TH	5	5	-	-
MAPK8IP3	5	5	-	-
C1R	5	5	-	-
PPP1R32	6	5	-	-
TNNI2	5	5	-	-
STMN4	6	5	-	-
OPRM1	5	5	-	-
GABRB3	6	5	-	-
DNAH3	5	5	-	-
SLC6A13	5	5	-	-
ADAM12	6	5	-	-
RPTOR	5	5	-	-
FRYL	5	5	-	-
SORCS1	5	5	-	-
NBAS	5	5	-	-
USP48	7	5	-	-
KIAA1109	6	5	-	-
FBN1	6	5	-	-
ACLY	6	5	-	-
NDRG1	7	5	yes	-
TIMELESS	5	5	-	-
ACTN1	7	5	-	-
COL3A1	7	5	yes	-
CACNA1C	6	5	-	-
CDHR2	8	5	-	-
PDE2A	6	5	-	-
INTS1	6	5	-	-
VWA1	5	5	-	-
GOPC	6	5	yes	-
PTPRM	5	5	-	-
WWC1	5	5	-	-
HUWE1	5	5	-	-
MYO3B	5	5	-	-
NFATC4	6	5	-	-
FLT4	6	5	yes	-
PIP5K1C	7	5	-	-
CYP2C19	5	5	-	-
CLCN1	6	5	-	-
ALDH1A2	5	5	-	-
TMEM59L	5	5	-	-
PKN1	5	5	-	-
ADCYAP1R1	6	5	-	-
MED12	7	5	yes	-
ITGA10	5	5	-	-
NEB	7	5	-	-
RIF1	6	5	-	-
COL11A1	7	5	-	-
MROH2B	7	5	-	-
ARHGAP4	5	5	-	-
PER1	5	5	yes	-
ARHGEF11	7	5	-	-
CDH23	6	5	-	-
CDC42BPA	5	5	-	-
CACNA1S	8	5	-	-
EVC2	6	5	-	-
AC096579.7	7	5	-	-
PKHD1	7	5	-	-
PLCE1	7	5	-	-
MMP17	5	5	-	-
NLRP5	9	5	-	-
LAMA5	7	5	-	-
PTPRN2	5	5	-	-
ANKRD31	5	5	-	-
DOCK3	5	5	-	-
CCDC108	5	5	-	-
MYH6	9	5	-	-
VPS13D	5	5	-	-
PLXNB2	5	5	-	-
CIDEC	7	5	-	-
SMG9	5	5	-	-
TMC6	5	5	-	-
NAV3	10	5	-	-
COL17A1	6	5	-	-
NEMF	5	5	-	-
ACVRL1	5	5	-	-
POMGNT1	5	5	-	-
KIF21B	10	5	-	-
EFR3B	5	5	-	-
KCNT1	6	5	-	-
MEGF8	7	5	-	-
SIDT1	8	5	-	-
KHSRP	12	5	-	-
KCNAB1	8	5	-	-
CARD10	7	5	-	-
LAMA2	5	5	-	-
INPP5A	5	5	-	-
RGS11	5	5	-	-
CACNA1F	5	5	-	-
RPS6KA4	6	5	-	-
CYP2A7	6	5	-	-
CTNNA2	5	5	yes	-
COL4A5	5	5	-	-
SORCS3	7	5	-	-
DOCK5	10	5	-	-
SBF1	8	5	-	-
WDR19	5	5	-	-
ROBO3	5	5	-	-
POLR2A	5	5	-	-
MROH5	6	5	-	-
DROSHA	5	5	yes	-
RFX6	7	5	-	-
CCDC19	6	5	-	-
PLCB3	7	5	-	-
SRCAP	6	5	-	-
ATP13A3	5	5	-	-
CACNA2D1	5	5	-	-
NRXN3	6	5	-	-
MYH2	7	5	-	-
PKD1L1	10	5	-	-
ADAM7	6	5	-	-
ESPL1	5	5	-	-
ANKRD30B	5	5	-	-
SLC12A5	5	5	-	-
MEGF10	5	5	-	-
BIN2	5	5	-	-
GLYR1	5	5	-	-
SHKBP1	5	5	-	-
ITIH4	6	5	-	-
LGALS4	5	5	-	-
ECEL1	6	5	-	-
PLEKHA4	5	5	-	-
C9	5	5	-	-
ZP2	5	5	-	-
CUL9	5	5	-	-
HDAC5	5	5	-	-
LPA	6	5	-	-
COL9A1	11	5	-	-
RAB4B-EGLN2	6	5	-	-
SNX25	5	5	-	-
PIEZO1	11	5	-	-
CLPP	5	5	-	-
COL24A1	8	5	-	-
COL1A2	5	5	-	-

## Sheet: introns18genes
Supplementary Table S5. The list of frequently mutated genes
Gene_ID	No. of mutations	No. of mutated samples	CGC	Driver gene
PTPRD	12	9	-	-
FAM135B	12	7	-	-
NOTCH2	6	6	-	-
ERBB4	7	6	-	-
COL1A1	12	6	-	-
PTCH1	8	5	-	-
CAMTA1	5	5	-	-
NDRG1	7	5	-	-
COL3A1	7	5	-	-
ROS1	6	5	-	-
FLT4	6	5	-	-
MED12	7	5	-	-
PER1	5	5	-	-
CTNNA2	5	5	-	-
DROSHA	5	5	-	-
