# Supplementary material for: Profile of Basal Cell Carcinoma Mutations and Copy Number Alterations - Focus on Gene-Associated Noncoding Variants
Source: Front Oncol. 2021 Nov 25;11:752579. doi: 10.3389/fonc.2021.752579 (PMC8656283; doi:10.3389/fonc.2021.752579)
Supplement: Supplementary file 9 [file Table_8.xlsx]

## Sheet: S8 Table
S8 Table. List of driver genes identified by the OncodriveFML analysis.
Gene_ID	No. of mutations	No. of mutated samples	Localization	Frequently mutated gene	CGC	OncodriveFML q-value
PTCH1	25	18	coding sequence	yes	yes	0.001859
PGK2	2	2	coding sequence	-	-	0.001859
ANKZF1	3	3	coding sequence	-	-	0.001859
TP53	15	11	coding sequence	yes	yes	0.001859
ZC2HC1C	3	3	coding sequence	-	-	0.0059488
IGSF21	5	4	coding sequence	-	-	0.0210687
PNPLA6	3	3	coding sequence	-	-	0.0584257
RORA	3	3	coding sequence	-	-	0.123933
F9	4	3	coding sequence	-	-	0.123933
KHDC3L	4	4	coding sequence	-	-	0.161113
PRDM9	5	4	coding sequence	-	-	0.161113
TGFB1I1	6	6	coding sequence	yes	-	0.161113
CARD6	5	5	coding sequence	yes	-	0.1716
ZNF281	3	3	coding sequence	-	-	0.196523
BAD	8	8	3UTR	yes	-	0.0002015
CEP85L	3	3	3UTR	-	-	0.0002015
PLXNB3	3	3	3UTR	-	-	0.000806
POU3F2	3	3	3UTR	-	-	0.0070525
TOPORS-AS1	8	7	3UTR	yes	-	0.017732
ECH1	2	2	3UTR	-	-	0.0577633
GRIA4	2	2	3UTR	-	-	0.22165
POLR2M	6	6	5UTR	yes	-	0.02295
GPATCH1	3	3	5UTR	-	-	0.02295
NPC1	4	4	5UTR	yes	-	0.02295
MXRA7	2	2	5UTR	-	-	0.07776
SH3BGRL3	2	2	5UTR	-	-	0.07776
UBAC2-AS1	2	2	5UTR	-	-	0.081
COLCA1	3	3	5UTR	-	-	0.0843136
CHCHD2	6	6	5UTR	yes	-	0.0843136
ARHGAP31	2	2	5UTR	-	-	0.0843136
ATP5A1	2	2	5UTR	-	-	0.0843136
SMIM7	3	3	5UTR	-	-	0.0843136
C6orf89	2	2	5UTR	-	-	0.0887625
POLR2E	3	2	5UTR	-	-	0.0919038
CTD-2292P10.4	3	3	5UTR	-	-	0.0989357
GRIP2	2	2	5UTR	-	-	0.11097
STMN1	2	2	5UTR	-	-	0.116691
RP11-156P1.3	2	2	5UTR	-	-	0.162771
RPL34-AS1	4	2	5UTR	-	-	0.162771
UQCC1	2	2	5UTR	-	-	0.162771
NOP56	2	2	5UTR	-	-	0.162771
DHODH	5	5	5UTR	yes	-	0.162771
CHID1	2	2	5UTR	-	-	0.1647
KIAA1033	3	2	5UTR	-	-	0.1647
MRPL13	2	2	5UTR	-	-	0.1647
EEF2	3	3	5UTR	-	-	0.165402
IKBKB	3	3	5UTR	-	yes	0.17119
SPHK2	4	4	5UTR	yes	-	0.1791
ADAMTS13	2	2	5UTR	-	-	0.197582
PEF1	3	3	5UTR	-	-	0.198171
SZT2	2	2	5UTR	-	-	0.21195
RP11-468E2.9	4	2	5UTR	-	-	0.233071
C7orf73	2	2	5UTR	-	-	0.24219
LY6G5C	2	2	5UTR	-	-	0.24219
NELL2	4	4	5UTR	yes	-	0.24219
DNAL1	2	2	5UTR	-	-	0.24219
PHF21B	3	3	5UTR	-	-	0.242212
