# Supplementary material for: Profile of Basal Cell Carcinoma Mutations and Copy Number Alterations - Focus on Gene-Associated Noncoding Variants
Source: Front Oncol. 2021 Nov 25;11:752579. doi: 10.3389/fonc.2021.752579 (PMC8656283; doi:10.3389/fonc.2021.752579)
Supplement: Supplementary file 10 [file Table_9.xlsx]

## Sheet: amplifications
S9 Table. List of significant focal CNAs.
Cytoband	q-value	Genes in peak
1p11.2	0.00066409	RNVU1-19
1p21.1	1.5273e-07	AMY1A;AMY1B;AMY1C;AMY2A
1p36.11	0.0085077	RHD;RSRP1
1q23.3	0.0056091	HSPA7;FCGR2C
1q31.3	0.0002748	CFHR1;CFHR3
2p11.2	0.067029	LOC654342
2p11.2	0.13046	LINC00152;MIR4435-2;MIR4771-1;MIR4435-1
3q29	0.04962	MUC20;LINC00969;MIR570;SDHAP2
4p15.2	0.15502	STIM2
4p16.1	0.0013923	USP17L6P;USP17L9P;USP17L24;USP17L25;USP17L26;USP17L27;USP17L28;USP17L29;USP17L30;USP17L11;USP17L12;USP17L13;USP17L17;USP17L19;USP17L20;USP17L15
4q11	0.016665	DCUN1D4
4q13.2	0.04962	UGT2B15;UGT2B17;TMPRSS11E
4q35.2	0.015971	DUX4;DBET
5p15.33	0.15502	ZDHHC11
5q13.2	0.053292	SMA5;LOC441081;GUSBP3;GUSBP9;LOC102724392
5q35.3	0.0013923	BTNL3;BTNL8
6p11.1	0.067029	LINC00680-GUSBP4
6p21.33	0.14038	CDSN;HLA-B;HLA-C;MICB;POU5F1;TCF19;DDX39B;HCP5;C6orf15;CCHCR1;PSORS1C1;PSORS1C2;HCG27;HCG26;MCCD1;SNORD117;PSORS1C3;MICA;ATP6V1G2-DDX39B;MIR6891
6p25.3	0.1787	IRF4;DUSP22
8p11.1	0.11276	POTEA
8p11.22	0.0013923	ADAM3A;ADAM18;ADAM32;ADAM5;LOC100130964
8p23.1	0.0003243	DEFB109P1;LOC649352;FAM66A
8p23.1	0.017884	FAM90A7P
8p23.1	0.12677	LINC00965
8q21.2	5.2029e-05	REXO1L2P
9p24.3	0.04962	FOXD4;FAM138A;FAM138C;WASH1;DDX11L5;MIR1302-2;MIR1302-9;MIR1302-10;MIR1302-11;PGM5P3-AS1
9q11	0.0013923	SPATA31A7
9q12	0.055592	SPATA31A7;FAM74A1;SPATA31A5
10q11.22	0.0018646	ANXA8L1;FAM25BP
10q26.3	0.0195	DUX4
11p11.11	5.2029e-05	OR4C46
11q12.2	0.0044963	PGA5;PGA3;PGA4
11q14.3	0.14918	TRIM49
12p13.31	0.0067779	KLRB1
12p13.33	0.015971	IQSEC3;FAM138D;LOC100288778
12q11	0.014298	ALG10
14q11.2	0.017884	OR4K5;OR11H2;OR4K1;OR4N2;OR4K2;OR4Q3;OR4M1
15q11.2	0.12677	NBEAP1;HERC2P3;GOLGA6L6;GOLGA8CP
15q26.3	0.0039317	LOC100128108
15q26.3	0.067029	OR4F4;WASH3P;FAM138E;DDX11L9;MIR1302-2;MIR1302-9;MIR1302-10;MIR1302-11;MIR6859-2;MIR6859-3;MIR6859-1
16p11.1	0.027041	LINC01566
16q11.1	0.0013923	ANKRD26P1
16q24.3	0.12677	FAM157C
17p11.1	0.0062493	LOC105371703
17p11.2	0.0013923	FAM106A;USP32P2;CCDC144B;LGALS9C;KRT16P1
17p11.2	0.14038	KCNJ12;C17orf51;KCNJ18
17q12	0.060228	TBC1D3F;TBC1D3C;LOC440434;TBC1D3;TBC1D3H;TBC1D3G;TBC1D3K;TBC1D3L;LOC101060389;TBC1D3E;TBC1D3I
17q21.31	5.2378e-05	NSF;LRRC37A;ARL17A;LRRC37A2;NSFP1;ARL17B
18p11.1	0.0013923	ROCK1
18q21.1	0.055592	TCEB3B;KATNAL2;TCEB3C;TCEB3CL;TCEB3CL2
19p13.3	0.11276	OR4F17;WASH5P;FAM138A;FAM138C;MIR1302-2;MIR1302-9;MIR1302-10;MIR1302-11
20p12.1	0.23142	SPTLC3;TASP1;ISM1;LOC100505515;ISM1-AS1;LOC101929486;LOC102606466
21p11.2	0.13998	TPTE
22q11.21	8.541e-06	RIMBP3;TMEM191B;PI4KAP1
22q11.23	0.04962	GRK3;CRYBB2;CRYBB2P1;IGLL3P;LRP5L;MIR6817
22q11.23	0.14918	DDT;GSTT2;GSTTP1;LOC391322;GSTTP2;GSTT2B;DDTL

## Sheet: deletions
Supplementary Table S7. The list of significant focal CNAs
Cytoband	q-value	Genes in peak
1p36.11	1.5712e-11	RSRP1
1p36.21	0.0002097	PRAMEF6
1p36.33	2.4402e-05	MMP23A;SLC35E2;CDK11A
1q21.1	1.75e-05	RNU1-4;RNU1-3;RNU1-2;RNU1-1;LOC388692;FAM72C;FAM231D;LOC645166;FCGR1CP;RNVU1-17
1q21.3	2.3838e-06	LCE2D;LCE3A;LCE3B;LCE3C
1q31.3	6.9686e-07	CFHR1
1q44	0.00044806	OR2T10;OR2T11
2p25.3	0.16222	TPO
2q37.3	0.093767	LOC285095;LOC102723927
3p12.3	3.1261e-05	FAM86DP;MIR1324;MIR4444-1
3q29	9.4318e-05	MUC4
3q29	0.00013096	MUC20;LINC00969;MIR570;SDHAP2;LOC105374297
4p16.1	5.8007e-06	USP17L9P;USP17L24;USP17L25;USP17L26;USP17L27;USP17L28;USP17L29;USP17L30;USP17L11;USP17L12;USP17L17;USP17L19;USP17L20
4q13.2	3.3037e-12	UGT2B28
4q13.2	1.192e-06	TMPRSS11E
5p15.33	0.049735	ZDHHC11
5q13.2	0.0051873	LOC102724392
5q35.3	1.192e-06	RACK1;BTNL3;OR2V1;TRIM7;TRIM52;TRIM41;BTNL9;OR2V2;SNORD95;SNORD96A;TRIM52-AS1;MIR4638;CTC-338M12.4;MIR8089;LOC102577426
5q35.3	4.544e-05	OR4F16;OR4F29
6p21.32	3.3037e-12	HLA-DQA1;HLA-DRA;HLA-DRB1;HLA-DRB5;HLA-DRB6
6p21.32	0.00020674	HLA-DPA1;HLA-DPB1;HLA-DPB2;HCG24
6p22.1	2.0079e-09	HLA-A;HCG4B
7q22.1	0.043116	RASA4;POLR2J2;SPDYE2;POLR2J3;UPK3BL;RASA4B
7q34	0.015407	TAS2R38;MGAM
8p11.22	3.1006e-06	ADAM3A;ADAM5
8p23.1	4.3066e-07	FAM90A10P
8p23.1	4.1454e-06	DEFB109P1;LOC649352;FAM66A
8p23.1	8.9848e-07	USP17L2;LOC392196;USP17L7;FAM66D
8q21.2	0.0051873	REXO1L2P
9p11.2	0.0022058	SPATA31A6
9p11.2	0.028976	ANKRD20A3;ANKRD20A2;AQP7P3;GXYLT1P3;FAM95B1;MIR1299;LOC101929583;LOC102724580
9p24.3	0.0010058	FOXD4;FAM138A;FAM138C;MIR1302-2;MIR1302-9;MIR1302-10;MIR1302-11;PGM5P3-AS1
10q26.3	1.2682e-10	DUX4
11q11	6.0393e-08	OR4P4;OR4C16;OR4C11;OR4S2;OR4C6
11q12.2	0.0070517	PGA5;PGA3;PGA4
11q14.3	0.0097518	TRIM49
12p13.2	0.0002843	TAS2R43;TAS2R46
13q11	5.8616e-06	FAM230C;LINC00417
14q32.33	0.1795	LINC00226;LINC00221;MIR5195;MIR7641-2
15q11.2	0.00058853	OR4N4;IGHV1OR15-1;OR4M2;OR4N3P
15q11.2	0.0070538	GOLGA6L1;GOLGA6L22;GOLGA8DP;MIR4509-1;MIR4509-2
15q26.3	0.081283	OR4F4;WASH3P;FAM138E;DDX11L9;MIR1302-2;MIR1302-9;MIR1302-10;MIR1302-11;MIR6859-2;MIR6859-3;MIR6859-1
16p11.2	0.001995	TP53TG3;LOC390705;TP53TG3C;TP53TG3B;TP53TG3E;TP53TG3F
16p13.11	0.029677	PDXDC1;MIR1972-1;MIR1972-2
17p11.2	0.00011769	FAM106A;USP32P2;LGALS9C
17q21.31	1.3806e-05	LRRC37A
18q21.1	8.6292e-05	TCEB3CL;TCEB3CL2
19p13.3	0.01578	OR4F17;WASH5P;FAM138A;FAM138C;MIR1302-2;MIR1302-9;MIR1302-10;MIR1302-11
19q13.31	0.00093503	PSG1;PSG2;PSG6;PSG7;PSG11;PSG10P;LOC100289650
20p13	0.0089527	CSNK2A1;FKBP1A;SOX12;TCF15;PSMF1;SNPH;SIRPB1;RBCK1;SDCBP2;ANGPT4;TMEM74B;NSFL1C;TRIB3;NRSN2;DEFB126;FAM110A;ZCCHC3;SCRT2;SLC52A3;TBC1D20;SIRPD;C20orf96;SRXN1;DEFB127;DEFB129;DEFB125;DEFB128;SIRPB2;RSPO4;DEFB132;C20orf202;RAD21L1;NRSN2-AS1;SDCBP2-AS1;FKBP1A-SDCBP2;MIR6869;LOC105372493	MIR6869	LOC105372493
21p11.2	0.056423	TPTE
22q11.1	0.057092	POTEH;OR11H1;CCT8L2;DUXAP8;POTEH-AS1;BMS1P17;LINC01297;BMS1P22
22q11.21	0.0020687	FAM230A;TMEM191B;LOC729461
22q11.23	0.00012523	DDT;GSTT2;GSTTP1;LOC391322;GSTT2B;DDTL
